1 **Full title:** Acceptability, feasibility and appropriateness of intensified health education,  
2 SMS/phone tracing and transport reimbursement for uptake of voluntary medical male  
3 circumcision in a sexually transmitted infections clinic in Malawi: a mixed methods study

4 **Short title:** Acceptability, feasibility and appropriateness of an intervention for VMMC scale-  
5 up

6 *Mitch M. Matoga*<sup>1,5</sup>, *Evaristar Kudowa*<sup>1</sup>, *Joachim Chikuni*<sup>1</sup>, *Mercy Tsidya*<sup>1</sup>, *Jennifer Tseka*  
7 *<sup>1</sup>*, *Beatrice Ndalama*<sup>1</sup>, *Naomi Bonongwe*<sup>1</sup>, *Esther Mathiya*<sup>1</sup>, *Edward Jere*<sup>1</sup>, *Dumbo Yatina*<sup>1</sup>,  
8 *Blessings Kamtambe*<sup>3</sup>, *Martin Kapito*<sup>4</sup>, *Mina C. Hosseinipour*<sup>1,2</sup>, *Charles S. Chasela*<sup>5,6</sup>,  
9 *Sara Jewett*<sup>7</sup>

10

11 <sup>1</sup>University of North Carolina Project, Lilongwe, Malawi

12 <sup>2</sup>Division of Infectious Diseases, University of North Carolina at Chapel Hill, Chapel Hill, NC,  
13 USA

14 <sup>3</sup>Bwaila STI clinic, Lilongwe District Health Office, Ministry of Health, Lilongwe, Malawi

15 <sup>4</sup>Department of HIV, Viral Hepatitis and STIs, Ministry of Health, Lilongwe, Malawi

16 <sup>5</sup>Department of Epidemiology and Biostatistics, School of Public Health, Faculty of Health  
17 Sciences, University of the Witwatersrand, Johannesburg, South Africa

18 <sup>6</sup>Implementation Science Unit, Right to Care, Centurion, Pretoria, South Africa.

19 <sup>7</sup>Health and Society Division, School of Public Health, Faculty of Health Sciences, University  
20 of the Witwatersrand, Johannesburg, South Africa

## 21 **Corresponding Author**

22 Mitch Matoga, MBBS, MSc, University of North Carolina Project, 100 Mzimba Road, Tidziwe  
23 Center, Lilongwe, Malawi. Phone 00265-1755-056; Fax 00265-1755-056; Email:

24 [MMatoga@unhcrilongwe.org](mailto:MMatoga@unhcrilongwe.org); [m.matoga@email.unc.edu](mailto:m.matoga@email.unc.edu)

25 **Author Contributions**

26 MM, MCH, SJ and CC contributed to the conceptualization and design of the study. MT, JT,  
27 BN, NB, EM, EJ, DY, BK, and MK assisted with data collection and curation. MM, EK and JC  
28 assisted with statistical analysis. MT, JT, MM and SJ contributed to the qualitative analysis.  
29 MM drafted this manuscript. All authors reviewed and approved the manuscript.

30

31

32

33

34

35

36

37

38

39

40

41

42

43

44

45

46

47 **ABSTRACT**

48 **Introduction:** Uptake of voluntary medical male circumcision (VMMC) remains a challenge in  
49 many settings. Innovative implementation strategies are required to scale-up VMMC uptake.

50 **Methodology:** RITe was a multi-faceted intervention comprising transport reimbursement (R),  
51 intensified health education (IHE) and SMS/Telephone tracing (Te), which increased the  
52 uptake of VMMC among uncircumcised men with sexually transmitted infections (STIs) in  
53 Malawi. Using a concurrent exploratory mixed-method approach, we assessed the  
54 intervention's acceptability, feasibility and appropriateness among men with STIs and  
55 healthcare workers (HCWs) at Bwaila District Hospital. Participants completed Likert scale  
56 surveys and participated in-depth interviews (IDIs) and focus group discussions (FGDs). We  
57 calculated percentages of responses to survey items and summarized common themes using  
58 thematic analysis. Median scores and interquartile ranges (IQR) were calculated for  
59 acceptability, feasibility and appropriateness of each strategy at baseline and end-line and  
60 compared using the Wilcoxon signed rank test.

61 **Results:** A total of 300 surveys, 17 IDIs and 4 FGDs were conducted with men and HCWs  
62 between baseline and end-line. The mean age for men in the survey was 29 years (SD  $\pm$ 8)  
63 and most were married/cohabiting (59.3%). Mean age for HCWs was 38.5 years (SD  $\pm$ 7), and  
64 most were female (59.1%). For acceptability, participants agreed that RITe was welcome,  
65 approvable, and likable. Despite participants agreeing that RITe was a good idea, culture and  
66 religion influenced appropriateness, particularly at baseline, which improved at end-line for Te  
67 and R. For feasibility, HCWs agreed that RITe was easy to implement, but expressed concerns  
68 that R (end-line median = 4, IQR: 2, 4) and Te (end-line median = 4, IQR: 4, 4), were resource  
69 intensive, hence unsustainable. Interviews corroborated the survey results. Participants  
70 reported that IHE provided important information, Te was a good reminder and R was  
71 attractive, but they reported barriers to R and Te such as electricity, limited access to phones  
72 and distrust in the government.

73 **Conclusions:** The RITe intervention was acceptable, feasible and appropriate. However,  
74 culture/religion and structural barriers affected perceptions of appropriateness and feasibility,  
75 respectively. Continued awareness raising on VMMC and addressing setting-specific  
76 structural factors are required to overcome barriers that impede demand-creation  
77 interventions for VMMC.

78 **Study registration:** ClinicalTrials.gov identifier: NCT04677374. Registered on December 18,  
79 2020.

80 **Key Words:** Voluntary Medical Male Circumcision; Uptake; Sexually Transmitted Infections;  
81 Implementation; Effectiveness, Intervention

82

83

84

85

86

87

88

89

90

91

92

93

94

95

96

## INTRODUCTION

97 Voluntary medical male circumcision (VMMC) is an evidence-based intervention for  
98 HIV prevention. VMMC reduces the risk of female-to-male HIV transmission by 60%[1–3] and  
99 protects against several sexually transmitted infections (STIs) [4]. Since 2007, VMMC  
100 coverage has increased in 15 high-priority countries in eastern and southern Africa with an  
101 estimated 26.8 million boys and men circumcised between 2008 and 2019, resulting in an  
102 estimated 340 000 new infections averted by 2019 [5]. In 2016, the Joint United Nations  
103 Program on HIV/AIDS (UNAIDS) set a global Fast-Tract target to circumcise an additional 25  
104 million boys and men in high-priority countries by 2020. About 15 million VMMCs were  
105 conducted between 2016 and 2020, but this number fell 40% short of the target [5,6].

106 VMMC uptake has varied across the priority countries. Some of the barriers that have  
107 affected uptake of VMMC in the region include culture; religion; fear of infection, bleeding, pain  
108 and complications; limited access to VMMC services; costs associated with accessing VMMC;  
109 fear of income loss during the recovery period; being attended to by a female provider; and  
110 misconceptions/lack of knowledge [7–11]. Other factors have facilitated the uptake of VMMC  
111 in the region such as perceived VMMC health benefits, perceived enhanced sexual  
112 performance and sexual pleasure among partners of circumcised men, peer/partner pressure,  
113 need for sociocultural conformity, and advice from health personnel [7–12].

114 Malawi adopted VMMC as a HIV prevention strategy in 2012. Despite the rapid scale-  
115 up of coverage in recent years, the country was 38% short of its 2,458,727 VMMC target by  
116 2020,[13] and prevalence of circumcision to date (medical and traditional) remains low around  
117 32% [14]. In an attempt to address some of the barriers and to increase VMMC uptake, we  
118 implemented a multi-faceted demand-creation strategy intervention consisting of transport  
119 **R**eimbursement, **I**ntensified health education and short message service (SMS)/**T**elephonic  
120 tracing (the RITe intervention), which increased VMMC uptake by 100% among uncircumcised  
121 men with STIs at Bwaila District Hospital in Lilongwe, Malawi. To better understand the  
122 implementation process and to assess the potential for scale-up of our intervention, we

123 evaluated the acceptability, feasibility and appropriateness of the RITe intervention among  
124 men with STIs and healthcare workers (HCWs).

125

126

## METHODS

127 Our manuscript followed the Good Reporting for A Mixed Methods Study (GRAMMS) checklist  
128 (S1 GRAMMS checklist).

### 129 **Study Design and Overview**

130 We conducted a cross-sectional survey using a concurrent exploratory mixed-  
131 methods approach nested within a larger implementation trial. We used a mixed-methods  
132 approach to have a comprehensive assessment of and to better understand the  
133 acceptability, feasibility and appropriateness of the RITe intervention among men and  
134 healthcare workers. The primary trial was a pragmatic pre- and post-interventional quasi-  
135 experimental study that measured baseline VMMC uptake and prospectively observed  
136 uncircumcised men with STIs for 30 days after implementation exposure for uptake of  
137 circumcision in Lilongwe, Malawi. The study demonstrated a 100% increase in VMMC  
138 uptake between the pre- and post-intervention periods [15]. The intervention was rolled-out  
139 in a sequential and incremental manner called implementation blocks. Implementation block  
140 1 was **I**ntensified health education, block 2 was **I**ntensified health education and  
141 SMS/telephonic **T**racing and Block 3 was **I**ntensified health education, SMS/telephonic  
142 **T**racing and transport **R**eimbursement (RITe).

143 Intensified health education (IHE) was comprehensive regular group health education  
144 (provided at least four sessions a day) tailored to men with STIs followed by one-on-one  
145 counseling by a trained mobilizer for interested men. An education guide was developed  
146 using expert opinion and literature with guidance from the Malawi VMMC communication  
147 strategy [13]. A trained VMMC mobilizer provided health education sessions with support  
148 from trained satisfied male and female clients (VMMC champions). All uncircumcised men

149 who presented to the STI clinic during the study period were sensitized on circumcision.  
150 SMS/telephonic (cell phone) tracing (“Te”) involved short message reminders to  
151 uncircumcised men sent on day 1, 3 and 7 after a STI clinic visit, followed by a phone call on  
152 day 14 for those who remained uncircumcised. Lastly, transport reimbursement (“R”) was a  
153 compensation of US \$10 provided to men who were confirmed to have received circumcision  
154 during the study period. Men who expressed interest in circumcision during each block were  
155 registered by the VMMC mobilizer and followed up for 30 days for uptake of circumcision.

156 Quantitative data were collected through Likert-scale surveys using the same men at  
157 baseline and end-line of each block. The surveys were also administered to HCWs at  
158 baseline and end-line.

159 Qualitative data was collected through focus group discussions (FGDs) with the  
160 same men at baseline and end-line, and through in-depth interviews (IDIs) with the same  
161 HCWs at baseline and end-line.

## 162 **Study Setting**

163 The study was conducted at the Bwaila District Hospital, a public secondary level  
164 health facility in Lilongwe, Malawi. The hospital is situated in a busy central town area and is  
165 the only facility with a specialized STI clinic in Lilongwe. The STI clinic sees approximately 60-  
166 80 patients per day and is staffed by clinicians, nurses, integrated testing services assistants,  
167 and counsellors. As standard practice, all patients receive group health education on HIV and  
168 STIs and are offered routine opt-out HIV testing, before receiving care for their STI. During the  
169 study period, health education was not offered and VMMC was not routinely offered at the  
170 clinic despite this being policy.

171 Free VMMC services are offered by the Ministry of Health as a ‘walk-in’ outpatient  
172 service. However, symptomatic STI patients are advised to receive circumcision after  
173 completion of treatment and resolution of symptoms. Just before study implementation,  
174 VMMC services were suspended in Malawi due to the COVID-19 pandemic for about 6

175 months. After the suspension was lifted, Bwaila hospital discontinued providing VMMC  
176 services as the VMMC clinic was repurposed to a COVID-19 isolation center, as a result, men  
177 interested in circumcision were referred to their nearest facility.

## 178 **Recruitment, sampling and sample size**

179 Participants were recruited from 01 February 2021 to 31 August 2021. Recruitment  
180 and sampling were largely convenient. Men who participated in the study were recruited by  
181 the VMMC mobilizer and VMMC champions during the IHE sessions. All men provided  
182 written informed consent to participate in the surveys and FGDs. For the baseline surveys,  
183 we recruited 146 uncircumcised men in total. To assess change in perceptions of  
184 acceptability and appropriateness following exposure to the intervention strategies, 132 of  
185 the 146 men participated in the end-line surveys. End-line surveys were initially restricted to  
186 circumcised men only but due to low incidence of circumcision, we included men involved in  
187 the baseline survey who were exposed to the intervention regardless of their circumcision  
188 status. We recruited 16 uncircumcised men for the two baseline FGDs (8 men in each  
189 session) before the intervention roll-out. We also conducted two end-line FGDs (5 men and  
190 6 men in each session) with both uncircumcised and men who received circumcision during  
191 the study period to assess perceptions and experiences on the intervention strategies in  
192 increasing VMMC uptake following exposure to the intervention.

193 The investigator and qualitative research assistants (RAs) recruited interested HCWs  
194 from within the STI clinic to participate in the surveys and IDIs. There were 22 HCWs eligible  
195 to participate at both baseline and end-line. All HCWs were invited to participate. Baseline  
196 IDIs and surveys were conducted before study roll-out. End-line IDIs and surveys were  
197 conducted towards the end of the implementation period (end-line). We recruited 12 HCWs  
198 for the baseline survey of whom 10 completed the end-line survey. For the IDIs, 10 HCWs  
199 participated in the baseline interviews of whom 7 participated in the end-line interviews.

200

## 201 **Data Collection**



202 *Quantitative*

203 Quantitative and qualitative data were collected at roughly the same time and  
204 independently from each other. Before data collection, all HCWs, qualitative RAs, the VMMC  
205 mobilizer and champions were trained by the first author on the study protocol and the data  
206 collection tools. The VMMC mobilizer and champions were also sensitized on basic  
207 information on HIV, STIs and VMMC and refreshed on research ethics and psychosocial  
208 counseling.

209

210 Following written informed consent, participants completed a 5-point Likert-scale  
211 survey on acceptability, feasibility and appropriateness. Acceptability and appropriateness  
212 surveys were administered to both men and HCWs while feasibility surveys were  
213 administered only to HCWs at end-line, following exposure to the intervention. The surveys  
214 were adapted and validated by the investigator from the acceptability of intervention  
215 measure (AIM), intervention appropriateness measure (IAM) and feasibility of intervention  
216 measure (FIM), which are psychometric measurement tools [16] for acceptability,  
217 appropriateness and feasibility, respectively as defined by Proctor et al [17]. The  
218 implementation outcomes were defined as follows:

- 219 - Acceptability: the perception among men and HCWs that the RITe intervention is  
220 (baseline) or was (endline) agreeable, palatable and satisfactory.
- 221 - Appropriateness: the perception among men and HCWs that the RITe intervention  
222 is (baseline) or was (endline) a good fit or relevant.
- 223 - Feasibility: the extent to which RITe intervention could be (baseline) or was  
224 (endline) successfully implemented at Bwaila STI clinic.

225 For acceptability, participants rated each strategy based on the following constructs:  
226 like/appeal, approve, willing, welcome and non-invasive to privacy. For appropriateness, each  
227 strategy was rated based on its fit with culture, and religion, whether it was a good idea and

228 not embarrassing. Feasibility of strategies was rated based on ease of implementation,  
229 possibility to be routine activity, implementable over time (sustainability), and availability of  
230 resources for implementation. Participants rated each construct using a 5-point Likert scale  
231 depending on their level of agreement or disagreement to the statements as: “Completely  
232 Agree”, “Agree”, “Neither”, “Disagree” and “Completely Disagree”. Surveys were self-  
233 administered for HCWs and assisted for men using Open Data Kit Collect v1.4.11 on electronic  
234 tablets (S2 survey tools). The survey also included demographic data including age, marital  
235 status and educational level for men and age, sex, cadre, and number of years of experience  
236 for HCWs.

237 Data were downloaded from the tablets on to a server every day and saved on a Microsoft  
238 Excel spreadsheet by a data officer. Data quality control and assurance checks were done  
239 weekly by a data officer.

#### 240 *Qualitative*

241 FGDs and IDIs were conducted at the UNC Project Bwaila research site building within the  
242 Bwaila district hospital. Participants were escorted by the mobilizer and champions to the  
243 interview rooms. The FGDs and IDIs were conducted by the investigator and two qualitative  
244 RAs, who also took field notes. Both FGDs and IDIs were audio recorded. IDIs lasted around  
245 60-90 minutes while FGDs lasted around 90-120 minutes. All interviews (FGDs and IDIs)  
246 were conducted in the local language (Chichewa).

247 Interview guides were developed by the investigator and a qualitative research  
248 expert. The interview guides were developed based on the quantitative survey tools AIM,  
249 IAM and FIM to complement the quantitative data. . The interview guides were piloted and  
250 revised before implementation. Similar to the surveys, we collected demographic data on  
251 age, sex, cadre and years of experience for IDIs and age, marital status, and education for  
252 FGDs.

253 Interview questions included exploring knowledge of VMMC including benefits and  
254 risks, barriers, facilitators to uptake of VMMC, myths and misconceptions about VMMC,  
255 perceptions/experiences of the RITe intervention strategies on increasing demand for uptake  
256 of VMMC, and the feasibility of delivering the RITe strategies in the STI clinic, among other  
257 questions (S3 interview guides).

258 All participants for the interviews and surveys were compensated with a \$10-  
259 equivalent in Malawi Kwacha. Interview notes were kept under a ‘double lock’ system only  
260 accessible to the investigators. Audio recordings were uploaded weekly to an encrypted file  
261 on the UNC Project server and deleted from the recorders.

## 262 **Analysis**

### 263 *Quantitative*

264 Descriptive statistics including means and proportions were used to summarize demographic  
265 characteristics of participants. Survey responses were coded as: “Completely Agree=5”,  
266 “Agree=4”, “Neither=3”, “Disagree=2” and “Agree=1”. We calculated percentages for each  
267 response to the constructs of acceptability, feasibility, and appropriateness surveys. We  
268 plotted histograms for each response to the survey constructs to display the distribution of  
269 responses. Median scores and interquartile ranges (IQR) were calculated for the constructs  
270 and summarized as an average score for acceptability, feasibility and appropriateness at  
271 baseline and end-line. The median scores for acceptability and appropriateness were  
272 compared between baseline and end-line using the Wilcoxon signed rank test with  
273 corresponding p-values. Statistical analysis was conducted using StataCorp, LLC, College  
274 Station, TX, USA, version 16.

### 275 *Qualitative*

276 Audio recordings were concurrently transcribed verbatim and translated into English by two  
277 bi-lingual qualitative RAs. Field notes from the interview were summarized immediately after  
278 the interviews. After the first FGD and 3 IDIs, we immediately reviewed the recordings and

279 transcriptions for completeness and data quality. Moving forward, a random sample of  
280 subsequent interviews was regularly reviewed for data quality by the investigator. Analysis  
281 was done by the investigator and RAs using the thematic content analysis approach [18]. A  
282 coding scheme was developed using a priori codes for the constructs and combined with  
283 inductive codes generated during data analysis. Double coding was done on all transcripts  
284 by the investigator and RAs. All coding discrepancies were discussed by the investigator and  
285 the qualitative RAs, and the last author assisted with resolving coding discrepancies. Codes  
286 were then categorized into salient themes and sub-themes. We used NVivo Version 12,  
287 QSR International, Burlington, MA, USA, organize data for analysis. Audit trails were  
288 maintained for all qualitative data, including audio recordings, transcripts, notes and all  
289 coding documents.

## 290 **Ethical consideration**

291 This study was approved by the National Health Sciences Research Committee of Malawi  
292 (NHSRC#: 19/10/2412), the University of the Witwatersrand Human Research Ethics  
293 Committee (HREC#: M200328) and the University of North Carolina at Chapel Hill Ethics  
294 Review Board (IRB#: 19-2559). The main trial was registered with the United States National  
295 Library of Medicine (NLM) at the National Institutes of Health Clinical Trial Registry  
296 (NCT04677374). All participants provided written informed consent before trial participation.  
297 Informed consent was administered by a trained data clerk for the surveys and by a  
298 qualitative research assistant for the FGDs and IDIs. The data clerk and qualitative research  
299 assistants guided the participants on how to sign the informed consent form. Illiterate  
300 participants provided a thumbprint as a sign of consent in the presence of an independent  
301 literate witness who co-signed the consent form.

## 302 **RESULTS**

### 303 **Quantitative findings**

304 For the surveys among men, 146 uncircumcised men were recruited for the baseline  
 305 surveys. Among the 146 men, 132 men (49 circumcised and 83 uncircumcised) men  
 306 participated in the end-line surveys. Mean age at baseline was 29 years (SD  $\pm 6$ ) and 28  
 307 years (SD  $\pm 7$ ) at end-line. Most men were married or cohabiting with a partner (60.3%  
 308 baseline, 59.9% end-line) and had secondary level education (52.1% baseline, 50.0% end-  
 309 line). Demographic characteristics were similar between baseline and end-line participants,  
 310 and between circumcised and uncircumcised men. Among HCWs, we recruited 12  
 311 participants for the baseline surveys of whom 10 participated in the end-line surveys. The  
 312 mean age among HCWs was 38 years (SD  $\pm 6$ ) at baseline and 38 years (SD  $\pm 8$ ) at end-line.  
 313 HCWs were mostly female (58.3% baseline, 60.0% end-line), nurses (59.1%) and with about  
 314 10 years of experience. The demographic characteristics were similar between HCWs at  
 315 baseline and end-line (Table 1).

316 Table 1: Demographic characteristics of men and healthcare workers who participated in surveys at  
 317 Bwaila STI Clinic

| Characteristic                | Men - Surveys  |                 |
|-------------------------------|----------------|-----------------|
|                               | Baseline N=146 | *End-line N=132 |
| Age (years), mean ( $\pm$ SD) | 29 (6)         | 28 (7)          |
| Age categories (years), n (%) |                |                 |
| 18-29 years                   | 80 (54.8)      | 66 (50.0)       |
| 30-39 years                   | 37 (25.3)      | 36 (27.3)       |
| $\geq 40$ years               | 29 (19.9)      | 30 (22.7)       |
| Marital status n (%)          |                |                 |
| Single                        | 53 (36.3)      | 49 (37.1)       |
| Married/Cohabiting            | 88 (60.3)      | 79 (59.9)       |
| Divorced                      | 4 (2.7)        | 4 (3.0)         |
| Widowed                       | 1 (0.7)        | 0 (0.0)         |
| Education n (%)               |                |                 |
| None                          | 4 (2.7)        | 3 (2.3)         |
| Primary                       | 55 (37.7)      | 53 (40.2)       |
| Secondary                     | 76 (52.1)      | 66 (50.0)       |
| >Secondary                    | 11 (7.5)       | 10 (7.5)        |
|                               |                |                 |
|                               | HCWs – Survey  |                 |
|                               | Baseline N=12  | *End-line N=10  |
| Age (years), mean ( $\pm$ SD) | 38 ( $\pm 6$ ) | 38 ( $\pm 8$ )  |
| Sex n (%)                     |                |                 |
| Male                          | 5 (41.7)       | 4 (40.0)        |
| Female                        | 7 (58.3)       | 6 (60.0)        |
| Cadre                         |                |                 |
| Nurse                         | 7 (58.3)       | 6 (60.0)        |

|                                                      |               |               |
|------------------------------------------------------|---------------|---------------|
| ITS counselor                                        | 4 (33.3)      | 3 (30.0)      |
| Data clerk                                           | 1 (8.3)       | 1 (10.0)      |
| <b>Experience (years), Mean (<math>\pm</math>SD)</b> | 10 ( $\pm$ 5) | 10 ( $\pm$ 4) |

318 SD- Standard deviation, HCW- Healthcare workers, FGDs - Focus group discussions, IDI – In-depth interviews.

319 \* Participants at end-line were a subset of participants at baseline.

320

### 321 **Acceptability, Feasibility and Appropriateness of IHE among men and HCWs**

322 **Figure 1** shows distribution of Likert scale scores for the acceptability, feasibility and  
 323 appropriateness of intensified health education at baseline and end-line among men and  
 324 HCWs. For acceptability, most men and HCWs completely agreed or agreed that IHE was  
 325 welcome, approvable, likable, and appealing both at baseline and end-line (**Figures 1A and**  
 326 **1B**). Average median score was 5 (IQR:5, 5) at both baseline and end-line for men, and 5  
 327 (IQR: 4,5) at baseline and end-line for HCWs (**Table 2**). For appropriateness, most men and  
 328 HCWs completely agreed or agreed that IHE was a good idea and not embarrassing to  
 329 discuss in public however, some men (approximately 30%) disagreed that IHE was a good fit  
 330 to their culture and religion at baseline, with more (slightly over half) who disagreed at end-  
 331 line in contrast to HCWs who rated IHE as a good fit to culture and religion (**Figures 1C and**  
 332 **1D**). Among men, the average median score dropped from 5 (IQR: 3,5) at baseline to 4  
 333 (IQR: 2, 5) ( $p=0.02$ ) at end-line (**Table 2**). Finally, most HCWs completely agreed or agreed  
 334 to all the constructs of feasibility with an average median score of 4 (IQR:4, 5) (**Table 2,**  
 335 **Figure 1E**).

336 Figure 1: Distribution of Likert scale scores for acceptability, feasibility and appropriateness of  
 337 intensified health education among men and HCWs at Bwaila STI Clinic at baseline and end-  
 338 line.

339

### 340 **Acceptability, Feasibility and Appropriateness of SMS/telephone tracing among men** 341 **and HCWs**

342 **Figure 2** shows distribution of Likert scale scores for acceptability, feasibility and  
343 appropriateness of SMS/phone call tracing among men and HCWs at baseline and end-line.  
344 For acceptability, most men and HCWs completely agreed or agreed that SMS/phone call  
345 tracing was welcome, approvable, likable and non-invasive to their privacy at baseline and  
346 end-line (**Figures 2A and 2B**). For appropriateness, most men and HCWs completely  
347 agreed or agreed that SMS/phone call tracing was a good idea and non-embarrassing  
348 (**Figure 2C and 2D**). However, over half of men at baseline disagreed or completely  
349 disagreed that SMS/phone call tracing for VMMC was a good fit to their culture and religion  
350 (median = 3, IQR: 2, 5) (**Figure 2C**). Upon exposure to the intervention, this perception  
351 improved at end-line (median = 4, IQR: 4, 5) ( $p=0.01$ ) (**Table 2, Figure 2C**). HCWs generally  
352 rated SMS/phone call tracing as a good fit to culture and religion as most completely agreed  
353 or agreed with a few that disagreed (less than 15%) at baseline and all fully agreeing at end-  
354 line (median = 4, IQR: 4,4) (**Table 2, Figure 2D**). Overall, SMS/phone call tracing was  
355 deemed feasible, but HCWs felt there weren't adequate resources to implement this strategy  
356 as routine practice (median = 4, IQR: 4, 4) (**Table 2, Figure 2E**).

357 Figure 2: Distribution of Likert scale scores for acceptability, feasibility and appropriateness of  
358 SMS/phone call tracing among men and HCWs at Bwaila STI Clinic at baseline and end-line.

359

### 360 **Acceptability, Feasibility and Appropriateness of transport reimbursement among** 361 **men and HCWs**

362 Overall, transport reimbursements were highly acceptable among men and HCWs at  
363 baseline and end-line with most participants completely agreeing and agreeing to the  
364 acceptability statements (**Figures 3A and 3B**). Transport reimbursements were appropriate  
365 among HCWs at baseline and end-line however, most men completely disagreed or  
366 disagreed that transport reimbursement for VMMC were a good fit to their culture and  
367 religion (median = 3, IQR: 2, 5). This perception improved at end-line after exposure to the

368 intervention (median = 4, IQR: 4, 5) (p=0.01) (**Table 2, Figures 3C and 3D**). Transport  
 369 reimbursements were deemed fairly feasible as some HCWs disagreed that they were easy  
 370 to implement and that resources were available (median = 4, IQR: 2, 4) (**Figure 3E**).

371 Figure 3: Distribution of Likert scale scores for acceptability, feasibility and appropriateness of  
 372 transport reimbursement among men and HCWs at Bwaila STI Clinic at baseline and end-line.

373

374 Table 1: Median scores for acceptability, appropriateness and feasibility at baseline and end-line

375 among men and healthcare workers at Bwaila STI clinic

| Intervention strategy        | Baseline<br>Median (IQR) | End-line<br>Median (IQR) | Wilcoxon signed<br>rank test |
|------------------------------|--------------------------|--------------------------|------------------------------|
| Intensified health education |                          |                          |                              |
| Acceptability - Men          | 5 (5, 5)                 | 5 (5, 5)                 | 0.876                        |
| Acceptability - HCWs         | 5 (4, 5)                 | 5 (4, 5)                 | 0.187                        |
| Appropriateness - Men        | 5 (3, 5)                 | 4 (2, 5)                 | 0.024                        |
| Appropriateness - HCWs       | 4 (4, 5)                 | 4 (4, 5)                 | 0.911                        |
| Feasibility - HCWs           | 4 (4, 5)                 |                          | NA                           |
| SMS and telephone tracing    |                          |                          |                              |
| Acceptability - Men          | 5 (5, 5)                 | 4 (4, 5)                 | <0.001                       |
| Acceptability - HCWs         | 4 (4, 5)                 | 4 (4, 4)                 | 0.558                        |
| Appropriateness - Men        | 3 (2, 5)                 | 4 (4, 5)                 | 0.011                        |
| Appropriateness - HCWs       | 4 (4, 4)                 | 4 (4, 4)                 | 1                            |
| Feasibility - HCWs           | 4 (4, 4)                 |                          | NA                           |
| Transport reimbursement      |                          |                          |                              |
| Acceptability - Men          | 5 (4, 5)                 | 5 (4, 5)                 | 0.539                        |
| Acceptability - HCWs         | 4 (4, 4)                 | 4 (4, 4)                 | 0.879                        |
| Appropriateness - Men        | 3 (2, 5)                 | 4 (4, 5)                 | <0.001                       |
| Appropriateness - HCWs       | 4 (4, 4)                 | 4 (4, 4)                 | 0.677                        |
| Feasibility - HCWs           | 4 (2, 4)                 |                          | NA                           |

376 IQR: Interquartile range

377 HCWs: Healthcare workers

### 378 Qualitative

379 Sixteen (16) uncircumcised men participated in the baseline FGDs and 11 (4 circumcised  
 380 men and 7 uncircumcised) men in the end-line FGDs. The demographic characteristics were  
 381 similar to those who participated in the surveys, with a mean age of 27 years (SD ±6) at  
 382 baseline 28 years (SD ±7) at end-line, and most being married (69% baseline, 45% end-line)  
 383 and with up to secondary school education (100% baseline, 91% end-line). There were 10



384 HCWs who participated in the baseline IDIs and seven were interviewed again at the end-  
 385 line. Similar to the survey participants, most were female nurses with about 10 years of work  
 386 experience (Table 3).

387 Table 3: Demographic characteristics of healthcare workers who participated in in-depth interviews  
 388 at Bwaila STI clinic.

|                                       | HCWs - IDIs   |               |
|---------------------------------------|---------------|---------------|
|                                       | Baseline N=10 | *End-line N=7 |
| <b>Age (years), mean (±SD)</b>        | 37 (±7)       | 39 (±9)       |
| <b>Sex n (%)</b>                      |               |               |
| Male                                  | 3 (30.0)      | 2 (28.6)      |
| Female                                | 7 (70.0)      | 5 (71.4)      |
| <b>Cadre</b>                          |               |               |
| Nurse                                 | 5 (50.0)      | 4 (57.1)      |
| ITS counselor                         | 4 (40.0)      | 2 (28.6)      |
| Data clerk                            | 1 (10.0)      | 1 (14.3)      |
| <b>Experience (years), mean (±SD)</b> | 10 (±6)       | 10 (±5)       |

389 HCWs – Healthcare workers

390 IDIs – Indepth interviews

391 ITS – Integrated Testing Services

392 \*Participants at end-line were a subset of participants at baseline

393

### 394 **Acceptability of IHE**

395 In line with quantitative results, IDIs and FDGs reinforced the acceptability of IHE. The  
 396 qualitative inputs provided additional insights on what made IHE acceptable and how it could  
 397 be improved to reach additional people and dispel myths and misconceptions.

### 398 Importance of information

399 Men and HCWs reported that they liked intensified health education because it provided  
 400 information on VMMC which was lacking in the community. They stated that it is difficult for  
 401 men to undergo VMMC without the right information. An added benefit of IHE was that once  
 402 men have the right information, they can spread the information to others in the community.

403 *“...most people would not decide to go through with VMMC if they have not been*  
 404 *taught. The best way would be to spread the information so that they are first taught.”*

405 (End-line FGD2, Respondent 2)

406

407 *“If you teach a person, they will also teach others and they will come back to the clinic*  
408 *with their friends so that even the friends can get better understanding.”* (End-line  
409 FGD2, Respondent 6)

410 However, both men and HCWs recommended that intensified health education should not only  
411 be provided at the health facility, but also in the community to extend reach.

412 *“It is also important to spread these messages (on VMMC) in the church so that*  
413 *everyone is aware.”* (Baseline FGD2, Respondent 5)

414

415 *“The best way, which would really be helpful is to reach out... you can travel from here*  
416 *to [name of ] village and plan for a soccer match between teams, teams that are*  
417 *famous and has players which the people in the rural area have never seen. People*  
418 *will rush to see the players and to watch the football. When the people come, before*  
419 *the match starts, the first thing you can give education.”* (End-line FGD1, Respondent  
420 1)

421

422 *“Some people even go to community leaders and give health talks, they mobilize*  
423 *people in the community. Another way would be to run radio adverts and people who*  
424 *are far can also hear the messages.”* (Baseline IDI, Nurse 4)

#### 425 Dispel myths and misconceptions

426 Both men and HCWs felt that IHE was a good intervention as it would help to dispel myths  
427 and misconceptions about VMMC in the community.

428 *“This education is very important because it will remove all the misconceptions or*  
429 *things that are against circumcision. As we said, I said that people think that when*  
430 *the foreskin is cut, the government uses it for other purposes. When this education is*  
431 *there, those views that are against the true aims of circumcision will be corrected*  
432 *because people will know and realize that the aim of circumcision is to protect their*  
433 *lives.”* (Baseline FGD2, Respondent 2)

434

## 435 **Appropriateness of IHE**

### 436 Culture and religion

437 In contrast to the survey results, where concerns were raised by men about appropriateness,  
438 there was a general sense from FGDs and IDIs that although culture and religion previously  
439 played a significant role in influencing decisions around VMMC, these are now losing their  
440 significance. According to HCWs, circumcision is now freely discussed everywhere including  
441 churches, hence IHE did not conflict with culture or religion.

442 *“I think that the cultures are losing their significance. I think it (IHE) would have no*  
443 *effect on culture and I do not think it would discourage people. That is because*  
444 *people already have knowledge on circumcision and so accepting this will not be*  
445 *very hard unlike the way things were previously.”* (Baseline IDI, ITS counselor)

446

447 *“Currently, they talk of circumcision even in the churches. I think the religion that was*  
448 *difficult was Nyau, but I think that even they take part in circumcision, so I don't see*  
449 *education on VMMC conflict with religion”* (End-line IDI, Nurse)

450

451 *“...issues of circumcision are now part of our normal lives. People now understand*  
452 *the importance of circumcision in the community including among boys or students.*  
453 *Some cultures like the Lomwes or Chewas and religions like Christians that did not*  
454 *believe in circumcision now before believe in it because of the medical benefits.”*

455 (End-line FGD1, Respondent 4)

456

## 457 **Feasibility of IHE**

458 In agreement with the quantitative data, IDIs reinforced the feasibility of IHE. HCWs, the  
459 implementers of the intervention, found IHE easy to implement and adoptable as routine  
460 practice.

461 Routine practice

462 Since group health education was already standard practice at the clinic, most HCWs felt  
463 that IHE could easily become routine practice and recommended it.

464 *“Yes, it (IHE) will fit in. It will be combined into what we already do because things  
465 like health education and sensitization talks are given on daily basis. As such, things  
466 like the health education would just go into the talks that have been happening all  
467 along.”* (End-line IDI, Nurse)

468 Easy implementation

469 HCWs reported that IHE would be easy to implement within the clinic because adding  
470 information on VMMC to the pre-existing talks would not feel like additional workload.

471 *“Umm, it (IHE) is easy to do because the one who gives the education is a different  
472 person and the people who provide other services are different too and so it is easy  
473 to do.”* (End-line IDI, ITS Counselor)

474  
475 *“As one of the people who gives health talks at this clinic, I thought adding  
476 circumcision to our usual health talks worked well since we were just adding extra  
477 content to what we already discuss. The talks on circumcision caused some  
478 interesting discussions and I could see that people including both men and women  
479 were interested to know more.”* (End-line IDI, Nurse)

480

481 **Acceptability of SMS/Telephone tracing**

482 The IDIs and FDGs corroborated the quantitative results and reinforced the acceptability of  
483 SMS/telephone tracing providing insights on why men and HCWs found this strategy  
484 acceptable including recommendations to use SMS/telephone tracing as an additional mode  
485 of communication post-circumcision.

486 Reminders

487 Both men and HCWs appreciated the SMS/telephone tracing strategy as a good way of  
488 reminding men who had appointments for VMMC to report for the procedure. As observed  
489 by one HCW:

490 *“Some people forgot when they had been given a date and so when we sent the*  
491 *SMS, it was a reminder.”* (End-line IDI, Data clerk)

#### 492 Source of encouragement

493 Beyond being a reminder, most men perceived SMS/telephone tracing as a source of  
494 encouragement to men who were doubting their decision to undergo VMMC.

495 *“We stay in different areas and you can agree to go to the clinic but as the day*  
496 *comes, you might start to reconsider your decision of going to the clinic. After you*  
497 *receive the reminder, you can get encouraged and even though you changed your*  
498 *mind, you can still decide to go to the clinic.”* (Baseline FGD1, Respondent 6)

#### 499 Private and confidential tracing

500 An additional advantage raised by several HCWs is that SMS/telephone tracing offers a  
501 private and confidential alternative to physical tracing.

502 *“Apart from the cost, I think that it is a private way. Some people do not want tracing*  
503 *cars to reach their homes or for the people doing the tracing to go to their homes. On*  
504 *that one, I feel you are maintaining the confidentiality of the potential client who will*  
505 *come for circumcision rather than physically visiting them.”* (Baseline IDI, Nurse)

#### 506 Additional mode of communication

507 As a recommendation, some respondent suggested that SMS/telephone tracing could be used  
508 as a means of communication with the doctor:

509 *“It (SMS/Telephone tracing) is a very good thing because after you have been*  
510 *circumcised and you are facing a certain challenge, it can be easy to get in touch*  
511 *with the doctor who sent the message and tell him how you are feeling. In that way, it*  
512 *would help the client save money because if the problem is small, he will easily get*  
513 *assisted.”* (Baseline FGD2, Respondent 7)

514

515 *“Even though we have been educated, we still hear things in the communities and*  
516 *among those things, there may be things that are against what we have learnt,*  
517 *depending on the different cultures as well. This can also give us an advantage of*  
518 *asking the doctors for clarity if there was anything discouraging you.”* (End-line FGD1,  
519 Respondent 4)

520

### 521 **Appropriateness of SMS/telephone tracing**

522 In accordance with the survey results, the qualitative data provided more insight into why  
523 SMS/telephone tracing was appropriate including suggestions on how to use SMS to reach  
524 more people, and also highlighted reasons why SMS/telephone tracing was inappropriate to  
525 culture and religion, particularly at baseline.

#### 526 Good idea

527 Participants reported that one SMS from a HCW has the potential to reach many people.

528 *“The messages are a good idea because they can be used to reach out to many*  
529 *people at once.”* (Baseline FGD2, Respondent 5)

530 One participant suggested that SMS can be used to spread information on VMMC, and the  
531 messages can be shared among people in the community to reach more people.

532 *“.....You can spread information on circumcision via phones and we can equally share*  
533 *the messages with other friends and if they want to come, they can come for*  
534 *circumcision.”* (Baseline FGD1, Respondent 5)

#### 535 Culture and Religion

536 There was a general sense from the FGDs that due to prevailing societal beliefs around  
537 promotional messages for various interventions, SMS/telephone reminders would lead to  
538 misconceptions in the community. One participant likened the strategy to a previous ‘blood

539 sucking' misconception around medical outreach services that were mistaken for a 'cult' or  
540 'satanism.'

541 *"There are wrong perceptions that we have in our cultures as well. If you receive a*  
542 *message and you tell people that 'I have received an SMS reminding me to go for*  
543 *circumcision', people will call it satanic with the times that we are in. The benefits are*  
544 *there, but the negatives are also there because most people believe that receiving an*  
545 *SMS that is encouraging you to do something that involves bleeding or body parts is*  
546 *satanic, that they want you to be a Satanist as well, just like the blood suckers."*

547 (Baseline FGD2, Respondent 3)

548 In line with the quantitative data, the qualitative data also demonstrated improved  
549 perceptions towards SMS/telephone tracing at end-line as portrayed below:

550 *"For me, it was a very good thing to send me a message. I did not have any problems*  
551 *with receiving a message to remind me about circumcision. It did not go against my*  
552 *culture or beliefs or religion. It was just fine."* (End-line FGD1\_Respondent 1)

553

#### 554 **Feasibility of SMS/telephone tracing**

555 In accordance with the quantitative data, the IDIs confirmed that SMS/telephone tracing was  
556 a straightforward strategy to implement and adopt as routine practice. In addition, the IDIs  
557 provided more insight into resource concerns in the quantitative data.

#### 558 Routine practice

559 Some men were of the view that SMS/telephone tracing was already routine practice  
560 because healthcare personnel send numerous messages on different health issues.

561

562 *"Yes, in short, I can explain that as health personnel, there are a lot of messages that*  
563 *you send out. The same way you send messages on other issues, you should do the*  
564 *same with this one (VMMC) regardless of how you think people might react."* (Baseline

565 FGD2, Respondent 2)

566 This was echoed by HCWs who felt that SMS/telephone tracing was not a new thing,  
567 comparing this to what happens in the HIV program.

568 *“It (SMS/Telephone tracing) is also very good because in other cases messages are*  
569 *sent to people to remind them to come and collect ARV’s (antiretroviral medication)*  
570 *for instance.” (End-line IDI, Nurse)*

#### 571 Technical and resource challenges

572 Concerns were raised that SMS/telephone tracing may not be easy to utilize due to technical  
573 and resource challenges such as low literacy, lack of phone ownership, and service provider  
574 and electricity challenges.

575 *“Just to add, I think the SMS would not really be helpful. That is because when we take*  
576 *a person from the rural areas, they use phones yes but all they know is to take calls.*  
577 *Even if there is a message, it is hard for them to read it.” (Baseline FGD2, Respondent*  
578 *1)*

579  
580 *“Most people either don’t have phones or they just sold it. It could be that the phone*  
581 *has been damaged and others do not have electricity in their homes. You would find*  
582 *that the day the message is sent, the phone is off.” (End-line IDI, Nurse)*

583

#### 584 **Acceptability of transport reimbursement**

##### 585 Offset costs

586 Both men and HCWs felt that transport reimbursement was a good intervention as it would  
587 help to offset the cost of transportation.

588 *“That is quite a good thought. The reason is that like I said, we are not doing VMMC*  
589 *here. As such, someone might want to undergo it (VMMC) but they might fail*  
590 *because they do not have transport to get to the clinic or to go back home after. That*



591 *will therefore help other people who might have not had any transport money to*  
592 *come to the clinic for VMMC. That is quite a good thought.” (RIT\_012)*

593 *Ease transportation*

594 Both men and HCWs alluded to the fact that transport reimbursement enabled men to travel  
595 to and from the clinic with ease, especially after undergoing circumcision.

596 *“It is good because with a wound, it was hard to travel and as I said, since we are not*  
597 *supposed to engage in hard labor after circumcision, so it is good.” (FGD3\_RITE\_R4)*

598 *“Some people who came to the clinic lived far. So, the money was helpful for them*  
599 *travel back home with ease.” FGD4\_RITE\_R1*

600 However, some men thought it would have been better if a car was provided to take men  
601 home after circumcision instead of transport reimbursement.

602 *“I think it was good for you to provide transport money, it was good. However, I feel it*  
603 *would have been better if you refunded the money used for transport when coming to*  
604 *the clinic but when going back home, you should have dropped us off. I am saying*  
605 *that because some of us live very far. After circumcision I got on a bus. From where*  
606 *the bus dropped me off, I had to get on a bicycle taxi in order to get home. By the*  
607 *time I got home I was in pain. So, it is better if they give you the money you spent*  
608 *when coming to the clinic, but they should drop you off at home afterwards...”*

609 *(FGD1\_RITE\_R4)*

610 *Attractive incentive*

611 There was a consensus of opinion that transport reimbursement was an attractive incentive as  
612 it involved money. Men being breadwinners were more attracted to the money as it would be  
613 ‘passive income’ that they can use to cover expenses during the post-circumcision period  
614 when they can’t be involved in ‘hard’ work.

615 *“The amount of \$10 that you have mentioned, they would not only use it for*  
616 *transport. They can also use it for their other needs. Some say that ‘after I am*

617 *circumcised, what will I eat in the week that I am nursing my wound'. Some people*  
618 *therefore would use it during that one week for their needs while they have the*  
619 *wound so that as the wound heals, they will have the strength to go back to looking*  
620 *for food. So, most people look at it from that angle and not just as transport.” (End-*  
621 *line IDI, Respondent 5)*

622 However, despite the consensus that transport reimbursement was attractive, some men felt it  
623 wasn't enough, reinforcing the idea that the opportunity costs of VMMC go beyond transport.

624 *“Yes, just to add, the strategy is good, but we really need to stress on the financial*  
625 *support for the family. We can be reimbursed the transport, but the main problem is*  
626 *how we will sustain our households. The transport reimbursement will only be useful*  
627 *for that same day and yet we will have to stay home for several days. Those other*  
628 *days are the ones that would be problematic.” (FGD1\_RITE\_R3)*

629

## 630 **Appropriateness of transport reimbursement**

### 631 Culture and religion

632 There were conflicting reactions concerning the appropriateness of transport reimbursement  
633 particularly its fit with culture and religion. Most men felt transport reimbursement would not  
634 be well received by Muslims:

635 *“For us Muslims, we would really be concerned and our leaders specifically. That is*  
636 *because it would completely reduce the number of people being circumcised in our*  
637 *culture. Most people would rush to be circumcised at the hospitals because as we*  
638 *have already said, money is a problem. So, there would be disappointment among our*  
639 *leaders because of the money. Few people would go to them compared to those who*  
640 *would go to the hospitals.” (Baseline FGD2, Respondent 4)*

641 In contrast, most HCWs felt the strategy was a good fit.

642 *“I think that the cultures do not have much influence. I think a lot of people would be*  
643 *happy to receive money for transportation regardless of their culture or religion.”*  
644 *(RIT\_001)*

#### 645 Result in misconceptions

646 Both men and HCWs raised concerns that transport reimbursement would be viewed as  
647 coercive, feeding into misconceptions in the community.

648 *“People would have different views. Some would think it is good while others would say*  
649 *that ‘because you have been circumcised, you have sold your foreskin’. They would*  
650 *think that the government has come up with this system as a way of buying your*  
651 *foreskin. (Baseline IDI, Counsellor)*

652

#### 653 **Feasibility of transport reimbursement**

##### 654 Unsustainable

655 It was a unanimous opinion by HCWs that transport reimbursement would not be made  
656 routine as there would be no financial resource for the government to implement this, as  
657 reflected in the following quote.

658 *“So, this strategy is good because we will reach the people and help them. But the*  
659 *issue is after the study is over and we want to continue. Sustainability becomes a*  
660 *challenge.... I do not think that government would be giving transport”. (End-line IDI,*  
661 *Nurse)*

662

#### 663 **DISCUSSION**

664 Among a population of men and healthcare workers at an urban STI clinic, the RITe  
665 intervention was generally acceptable, feasible and appropriate. Participants expressed that  
666 all strategies were acceptable. However, the cultural and religious appropriateness of some  
667 strategies were questioned in some cases, particularly at baseline. Notably, appropriateness  
668 improved at end-line for SMS/telephone tracing and transport reimbursement but not for IHE.

669 From the HCW perspective, intensified health education was perceived to be the most  
670 feasible strategy in contrast to SMS/telephone tracing and transport reimbursement.

671 Intensified health education was rated as highly acceptable among men and HCWs  
672 at baseline and end-line. The high acceptability was corroborated in the qualitative results  
673 where most men and HCWs perceived IHE as a source of important information and a  
674 means of dispelling myths and misconceptions on VMMC. This was further evidenced by  
675 men and HCWs advocating for IHE to be extended to the community. IHE was deemed  
676 highly feasible resulting in HCWs recommending IHE to be integrated into routine health  
677 education at the clinic. Health education/awareness continues to be one of the most  
678 effective, feasible and acceptable interventions for improving uptake of VMMC in most  
679 settings [19,20]. Several approaches to health education have all been acceptable in VMMC  
680 programs. These include sensitizing community or religious leaders/organization [21–23],  
681 schools [22], influencers [21,24], mass media [23] and peer recruiters and women  
682 [21,22,25]. Other approaches are using satisfied clients [26], mobilizers [22,23,26], one-on-  
683 one counselling [26], house-to-house sensitization [26], distribution of educational materials  
684 [23,26], and targeting men hangouts [26].

685 Although some participants in our study postulated that culture and religion no longer  
686 play a significant role in influencing peoples' perceptions on VMMC and that talking about  
687 circumcision in the community is normal, this perspective was not shared universally. For  
688 example, culture and religion still influenced IHE appropriateness level in the surveys and  
689 religious concerns were flagged in relation to transport reimbursement during FGDs. Another  
690 observation is that appropriateness of IHE was conflated with appropriateness of  
691 circumcision in general as men did not distinctly separate the two. We believe this  
692 contributed to the views on appropriateness in the surveys and FGDs. In a recent systematic  
693 review of barriers to uptake of VMMC in priority countries, negative perceptions of VMMC  
694 due to culture and/or religion was the most cited barrier [7]. Our findings agree with the  
695 suggestions that VMMC communication should separate circumcision from cultural or

696 religious identities and emphasize the medical benefits of circumcision for all men;  
697 community and religious leaders should be engaged in VMMC awareness efforts in order to  
698 shift norms [7].

699 Our findings also indicated high acceptance of the SMS/telephone tracing strategy  
700 among men and HCWs at baseline and end-line. Participants liked, approved and welcomed  
701 the strategy as a reminder for VMMC appointments. Men specifically liked SMS/telephone  
702 tracing as a source of encouragement to undergo VMMC and as an opportunity for  
703 communicating with HCWs in case of questions or challenges during the recovery period.  
704 HCWs liked the strategy as a means of maintaining private and confidential communication  
705 with VMMC clients. An SMS intervention was found acceptable by providers and men in  
706 another study where SMS was used for post-circumcision follow up [27]. The messages  
707 reminded clients of the signs of poor healing and provided a platform to communicate with  
708 providers which reduced unnecessary in-person clinic visits,[27] both reasons being similar  
709 to those elicited in our study.

710 Participants raised a few concerns on appropriateness of SMS/telephone tracing at  
711 baseline. However, their perceptions of the appropriateness of SMS/telephone tracing  
712 improved at the end-line. This was reflected in the FGDs where men feared that  
713 SMS/telephone tracing would result in misconceptions in the community. One participant  
714 reported that messages on VMMC would be perceived as ‘satanic’ in the community as they  
715 would be likened to messages that people receive enticing them to ‘cults’ and religion.  
716 However, these concerns did not reappear at end-line, after exposure to the intervention. In  
717 contrast, an SMS intervention for VMMC was equally culturally appropriate in two recent  
718 studies from Zimbabwe [27] and South Africa [28] that assessed acceptability and  
719 appropriateness of SMS in post-operative follow-up among VMMC clients.

720 The feasibility of SMS/telephone tracing was hampered by lack of mobile phone  
721 access, low literacy and technical constraints such as network coverage. These limitations  
722 are not uncommon in resource-limited settings. In a systematic review on barriers to use of

723 mobile health in improving health outcomes in developing countries, in which 60% of the  
724 studies were SMS-based, some of the most common barriers were lack of access to phones  
725 and inability to use them [29]. In contrast, studies have reported high feasibility and usability  
726 of SMS interventions; however, they included cell phone ownership as part of the eligibility  
727 criteria [27,28]. Therefore, it is not surprising that feasibility and usability was high in these  
728 studies because of the correlation between frequency of phone usage and knowledge of the  
729 SMS technology [29], which is higher among people who are literate and own phones.

730 In Malawi, the Global Systems for Mobile Communication Association estimated that  
731 access to mobile phones was around 57.2% in 2023 [30]. In our study, about 61% of men  
732 owned a phone, while 30% of those without a phone provided an alternative phone number  
733 belonging to someone they trusted and 9% did not own a phone. It is likely that the low cell  
734 phone coverage in the country compounded by the technical barriers may have influenced  
735 feasibility assessment among HCWs. Nonetheless, SMS is very popular in developing  
736 countries, and it can be used for interventions and health education [29].

737 Transport reimbursement attracted a lot of attention among men in this study. The  
738 strategy was rated highly acceptable by men and HCWs. Our findings agree with regional  
739 results that monetary incentives are generally attractive and effective [19,20]. In this study,  
740 transport reimbursement was viewed as a way of offsetting the cost of commuting to health  
741 facilities and easing travel especially post-circumcision, and a source of encouragement to  
742 undergo VMMC. However, some men preferred receiving transport reimbursement for travel  
743 to the facility only and being ferried home in a vehicle post-circumcision to reduce chances  
744 of being in pain before arriving home.

745 Though considered attractive, other men reported that reimbursing transport was not  
746 adequate. They preferred receiving additional support to feed their families during the  
747 recovery period as financial concerns due to missing work or losing income and family  
748 survival during the recovery period are common concerns among men in resource-  
749 constrained setting [31]. In contrast, some men perceived the transport reimbursement as

750 more than adequate and that it would be coercive as men would undergo circumcision  
751 because of the money [20].

752 Interestingly, the appropriateness of transport reimbursement attracted mixed  
753 reactions. On the one hand, some men reported that transport reimbursement would conflict  
754 with the Muslim religion as most people would prefer VMMC due to the monetary incentive  
755 over 'ritual' circumcision, which is done at a cost to the client. On the other hand, HCWs  
756 reported no conflict with religion. Apart from religion, some reported that transport  
757 reimbursement would reinforce misconceptions in the community, that people would think  
758 the government is buying foreskins for trade with western countries. This misconception has  
759 also been reported in other priority countries [32].

760 Healthcare workers unanimously viewed transport reimbursement as an  
761 unsustainable strategy as most governments in low- to mid-income countries would not be  
762 able to provide monetary incentives as routine practice. Even though financial incentives are  
763 the most effective strategy for increasing demand for VMMC, sustainability is indeed a  
764 concern in developing countries [33]. Hence, it is generally recommended that financial  
765 incentives should not be considered as a primary demand-creation strategy but as an  
766 additional strategy among many tools [33]. Financial incentives should be considered when  
767 a certain threshold of coverage has been reached to encourage late adopters to undergo  
768 circumcision, thereby improving the cost-effectiveness [33].

769 The strength of this study is in the extensive assessment of acceptability, feasibility  
770 and appropriateness through a mixed-methods approach which allowed us to triangulate  
771 findings from both sources to better explain our results. On the contrary, our study may have  
772 limited generalizability in rural settings. We hypothesize that barriers such as culture and  
773 religion are likely to be more dominant in rural settings than in urban settings [9]. However,  
774 considering that most of men in the study had up to secondary school education, findings  
775 could be somewhat similar if this study was repeated in a rural setting. In addition, the  
776 strategies were likely more acceptable, appropriate and feasible in an STI clinic setting as

777 men with STIs could have seen a greater value in undergoing VMMC as part of treatment of  
778 their STI compared to outpatient clinic settings where VMMC is offered/provided in most  
779 facilities.

780 Our intervention with intensified health education, SMS/telephone tracing and  
781 transport reimbursement strategies was found acceptable, feasible and appropriate by men  
782 and healthcare workers as strategies for increasing demand for VMMC at an urban STI  
783 clinic. Among the strategies, intensified health education was highly acceptable, feasible and  
784 appropriate. More awareness is required to address cultural and religious barriers to VMMC.  
785 SMS interventions are gaining popularity and are bound to have more impact as countries  
786 continue to develop. Monetary incentives such as transport reimbursement are highly  
787 attractive but they should not be considered as a primary demand-creation strategy.

788

## 789 **Acknowledgements**

790 We would like to thank the Lilongwe District Health Office, the Bwaila STI clinic team, Mrs.  
791 Chimwemwe Kana and the VMMC team from Jhpiego Malawi Office and VMMC program  
792 coordinators from Lumbadzi Health Center, Kang'ona Health Center, Chitedze Health Center,  
793 Area 25 Health Center and Area 30 Health Center for their support in conducting this study.  
794 We also thank the men who participated in this study.

795 This project was supported by NIH Fogarty grant # D43 TW009340, D43 TW010060 and D43  
796 TW009774-06. The study sponsors have not had any role in the study design and will not play  
797 a role in collection, management, analysis and interpretation of data; writing the report; and  
798 the decision to submit the report for publication.

799

800

801



802

## References

- 803 1. Bailey RC, Moses S, Parker CB, Agot K, Maclean I, Krieger JN, et al. Male circumcision for HIV  
804 prevention in young men in Kisumu, Kenya: a randomised controlled trial. *Lancet*.  
805 2007;369(9562):643–56.
- 806 2. Auvert B, Taljaard D, Lagarde E, Sobngwi-Tambekou J, Sitta R, Puren A. Randomized, controlled  
807 intervention trial of male circumcision for reduction of HIV infection risk: The ANRS 1265 trial.  
808 *PLoS Med* [Internet]. 2005 [cited 2018 Feb 11];2(11):1112–22. Available from:  
809 [http://journals.plos.org/plosmedicine/article/file?id=10.1371/journal.pmed.0020298&type=p](http://journals.plos.org/plosmedicine/article/file?id=10.1371/journal.pmed.0020298&type=printable)  
810 [rintable](http://journals.plos.org/plosmedicine/article/file?id=10.1371/journal.pmed.0020298&type=printable)
- 811 3. Gray RH, Kigozi G, Serwadda D, Makumbi F, Watya S, Nalugoda F, et al. Male circumcision for  
812 HIV prevention in men in Rakai, Uganda: a randomised trial. *Lancet*. 2007 Feb  
813 24;369(9562):657–66.
- 814 4. Matoga M, Hosseinipour MC, Jewett S, Hoffman IF, Chasela C. Effects of HIV voluntary medical  
815 male circumcision programs on sexually transmitted infections. *Curr Opin Infect Dis*.  
816 2021;34(1):50–5.
- 817 5. UNAIDS & World Health Organisation (WHO). Voluntary medical male circumcision: Progress  
818 Report [Internet]. Geneva, Switzerland: UNAIDS and WHO; 2021. Available from:  
819 [https://www.unaids.org/sites/default/files/media\\_asset/JC3022\\_VMMC\\_en.pdf](https://www.unaids.org/sites/default/files/media_asset/JC3022_VMMC_en.pdf)
- 820 6. UNAIDS. On the Fast-Track to end AIDS. 2016-2021 Strategy. Geneva, Switzerland: UNAIDS and  
821 WHO; 2021.
- 822 7. Carrasco MA, Wilkinson J, Kasdan B, Fleming P. Systematic review of barriers and facilitators  
823 to voluntary medical male circumcision in priority countries and programmatic implications for  
824 service uptake. *Glob Public Health*. 2019 Jan 2;14(1):91–111.
- 825 8. Mhagama P, Makono P, Tsitsi C. Communication-related factors influencing the uptake of  
826 voluntary medical male circumcision among men in Lilongwe Urban, Malawi. *Cogent Med*.  
827 2021 Jan 1;8(1).
- 828 9. Masese R, Mwalabu G, Petrucka P, Mapulanga P. Key challenges to voluntary medical male  
829 circumcision uptake in traditionally circumcising settings of Machinga district in Malawi. *BMC*  
830 *Public Health*. 2021 Dec 1;21(1).
- 831 10. Masese RJ, Chimango JL, Mbirimtengerenji ND. Overcoming Barriers to Uptake of Voluntary  
832 Medical Male Circumcision in a Traditionally Circumcising Community in Machinga District,  
833 Malawi. *World J AIDS*. 2017;07(01):40–58.
- 834 11. Umar E, Mandalazi P, Jere D, Muula A. Should female health providers be involved in medical  
835 male circumcision? Narratives of newly circumcised men in Malawi. *Malawi Medical Journal*.  
836 2013;25(3):72–7.
- 837 12. Mfutso Bengo J, Chalulu K, Jobiba Chinkhumba F, Kazembe L, Maleta KM, Masiye F, et al.  
838 Situation analysis of male circumcision in Malawi. Blantyre; 2010.
- 839 13. National AIDS Commission. National VMMC Communication Strategy 2020-2025. Lilongwe,  
840 Malawi: National AIDS Commission; 2019.

- 841 14. Malawi Ministry of Health. Integrated HIV Program Report October - December 2020  
842 [Internet]. Lilongwe, Malawi: Ministry of Health; 2021. Available from:  
843 [www.hiv.health.gov.mw](http://www.hiv.health.gov.mw)
- 844 15. Matoga MM, Kudowa E, Ndalama B, Bonongwe N, Mathiya E, Jere E, et al. Effectiveness of an  
845 intervention to increase uptake of voluntary medical male circumcision among men with  
846 sexually transmitted infections in Malawi: A preinterventional and postinterventional study.  
847 *BMJ Open*. 2023 Oct 3;13(10).
- 848 16. Weiner BJ, Lewis CC, Stanick C, Powell BJ, Dorsey CN, Clary AS, et al. Psychometric assessment  
849 of three newly developed implementation outcome measures. *Implementation Science*. 2017  
850 Aug 29;12(1).
- 851 17. Proctor E, Silmere H, Raghavan R, Hovmand P, Aarons G, Bunger A, et al. Outcomes for  
852 implementation research: Conceptual distinctions, measurement challenges, and research  
853 agenda. *Administration and Policy in Mental Health and Mental Health Services Research*  
854 [Internet]. 2011 [cited 2018 Nov 15];38(2):65–76. Available from:  
855 [https://www.ncbi.nlm.nih.gov/pmc/articles/PMC3068522/pdf/10488\\_2010\\_Article\\_319.pdf](https://www.ncbi.nlm.nih.gov/pmc/articles/PMC3068522/pdf/10488_2010_Article_319.pdf)
- 856 18. Dawadi S. Thematic Analysis Approach: A Step by Step Guide for ELT Research Practitioners.  
857 Vol. 25, *Journal of NELTA*. 2020.
- 858 19. Ensor S, Davies B, Rai T, Ward H. The effectiveness of demand creation interventions for  
859 voluntary male medical circumcision for HIV prevention in sub-Saharan Africa: a mixed  
860 methods systematic review. *Journal of International AIDS Society* [Internet].  
861 2019;22(S4):e25299. Available from:  
862 <http://onlinelibrary.wiley.com/doi/10.1002/jia2.25299/full>
- 863 20. Atkins K, Yeh PT, Kennedy CE, Fonner VA, Sweat MD, O'Reilly KR, et al. Service delivery  
864 interventions to increase uptake of voluntary medical male circumcision for HIV prevention: A  
865 systematic review. *PLoS One*. 2020 Jan 1;15(1).
- 866 21. Miiro G, DeCelles J, Rutakumwa R, Nakiyingi-Miiro J, Muzira P, Ssembajjwe W, et al. Soccer-  
867 based promotion of voluntary medical male circumcision: A mixed-methods feasibility study  
868 with secondary students in Uganda. *PLoS One*. 2017 Oct 1;12(10).
- 869 22. Montague C, Ngcobo N, Mahlase G, Frohlich J, Pillay C, Yende-Zuma N, et al. Implementation  
870 of adolescent-friendly voluntary medical male circumcision using a school based recruitment  
871 program in rural KwaZulu-Natal, South Africa. *PLoS One*. 2014 May 2;9(5).
- 872 23. Wambura M, Mahler H, Grund JM, Larke N, Mshana G, Kuringe E, et al. Increasing voluntary  
873 medical male circumcision uptake among adult men in Tanzania. Vol. 31, *AIDS*. Lippincott  
874 Williams and Wilkins; 2017. p. 1025–34.
- 875 24. Weiss SM, Zulu R, Jones DL, Redding CA, Cook R, Chitalu N. The Spear and Shield intervention  
876 to increase the availability and acceptability of voluntary medical male circumcision in Zambia:  
877 a cluster randomised controlled trial. *Lancet HIV*. 2015 May 1;2(5):e181–9.
- 878 25. Lanham M, L'Engle KL, Loolpapit M, Oguma IO. Women's Roles in Voluntary Medical Male  
879 Circumcision in Nyanza Province, Kenya. *PLoS One* [Internet]. 2012 [cited 2019 Apr  
880 21];7(9):44825. Available from: [www.plosone.org](http://www.plosone.org)

- 881 26. World Health Organization. Preventing HIV Through Safe Voluntary Medical Male Circumcision  
882 for Adolescent Boys and Men in Generalized HIV Epidemics: Recommendations and Key  
883 Considerations. [Internet]. Web Annex 5.2,. Geneva; 2020 [cited 2024 Mar 8]. Available from:  
884 <https://www.ncbi.nlm.nih.gov/books/NBK562471/>
- 885 27. Feldacker C, Holeman I, Murenje V, Xaba S, Korir M, Wambua B, et al. Usability and  
886 acceptability of a two-way texting intervention for post-operative followup for voluntary  
887 medical male circumcision in Zimbabwe. *PLoS One*. 2020 Jun 1;15(6).
- 888 28. Pienaar J, Day S, Setswe G, Wasunna B, Ncube V, Ndebele F, et al. 'I understood the texting  
889 process well'. Participant perspectives on usability and acceptability of SMS-based telehealth  
890 follow-up after voluntary medical male circumcision in South Africa. *Digit Health*. 2023 Jan 1;9.
- 891 29. Kruse C, Betancourt J, Ortiz S, Luna SMV, Bamrah IK, Segovia N. Barriers to the use of mobile  
892 health in improving health outcomes in developing countries: Systematic review. Vol. 21,  
893 *Journal of Medical Internet Research*. JMIR Publications Inc.; 2019.
- 894 30. The Global System for Mobile Communications Association. Digital 2023: Malawi -  
895 DataReportal - Global Digital Insights [Internet]. GSMA. 2023 [cited 2024 Mar 10]. Available  
896 from: <https://datareportal.com/reports/digital-2023-malawi>
- 897 31. Evens E, Lanham M, Hart C, Loolpapit M, Oguma I, Obiero W. Identifying and addressing  
898 barriers to uptake of voluntary medical male circumcision in Nyanza, Kenya among men 18-35:  
899 A qualitative study. *PLoS One*. 2014 Jun 5;9(6).
- 900 32. Nevin PE, Pfeiffer J, Kibira SPS, Lubinga SJ, Mukose A, Babigumira JB. Perceptions of HIV and  
901 safe male circumcision in high HIV prevalence fishing communities on lake Victoria, Uganda.  
902 *PLoS One*. 2015 Dec 1;10(12).
- 903 33. Carrasco MA, Grund JM, Davis SM, Ridzon R, Mattingly M, Wilkinson J, et al. Systematic review  
904 of the effect of economic compensation and incentives on uptake of voluntary medical male  
905 circumcision among men in sub-Saharan Africa. *AIDS Care - Psychological and Socio-Medical*  
906 *Aspects of AIDS/HIV* [Internet]. 2018 Sep 2 [cited 2021 Aug 26];30(9):1071–82. Available from:  
907 <https://pubmed.ncbi.nlm.nih.gov/29566546/>
- 908

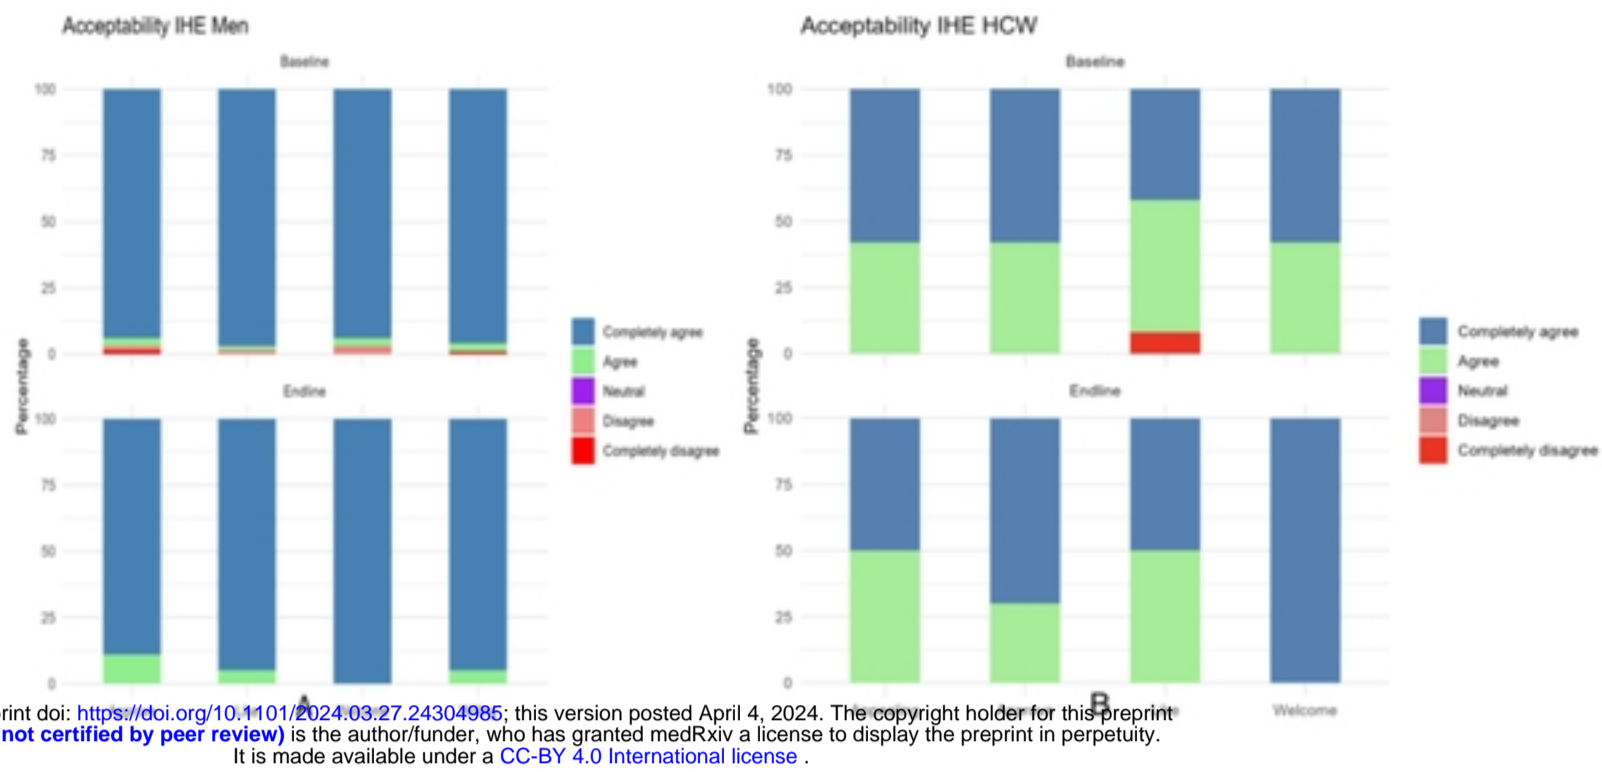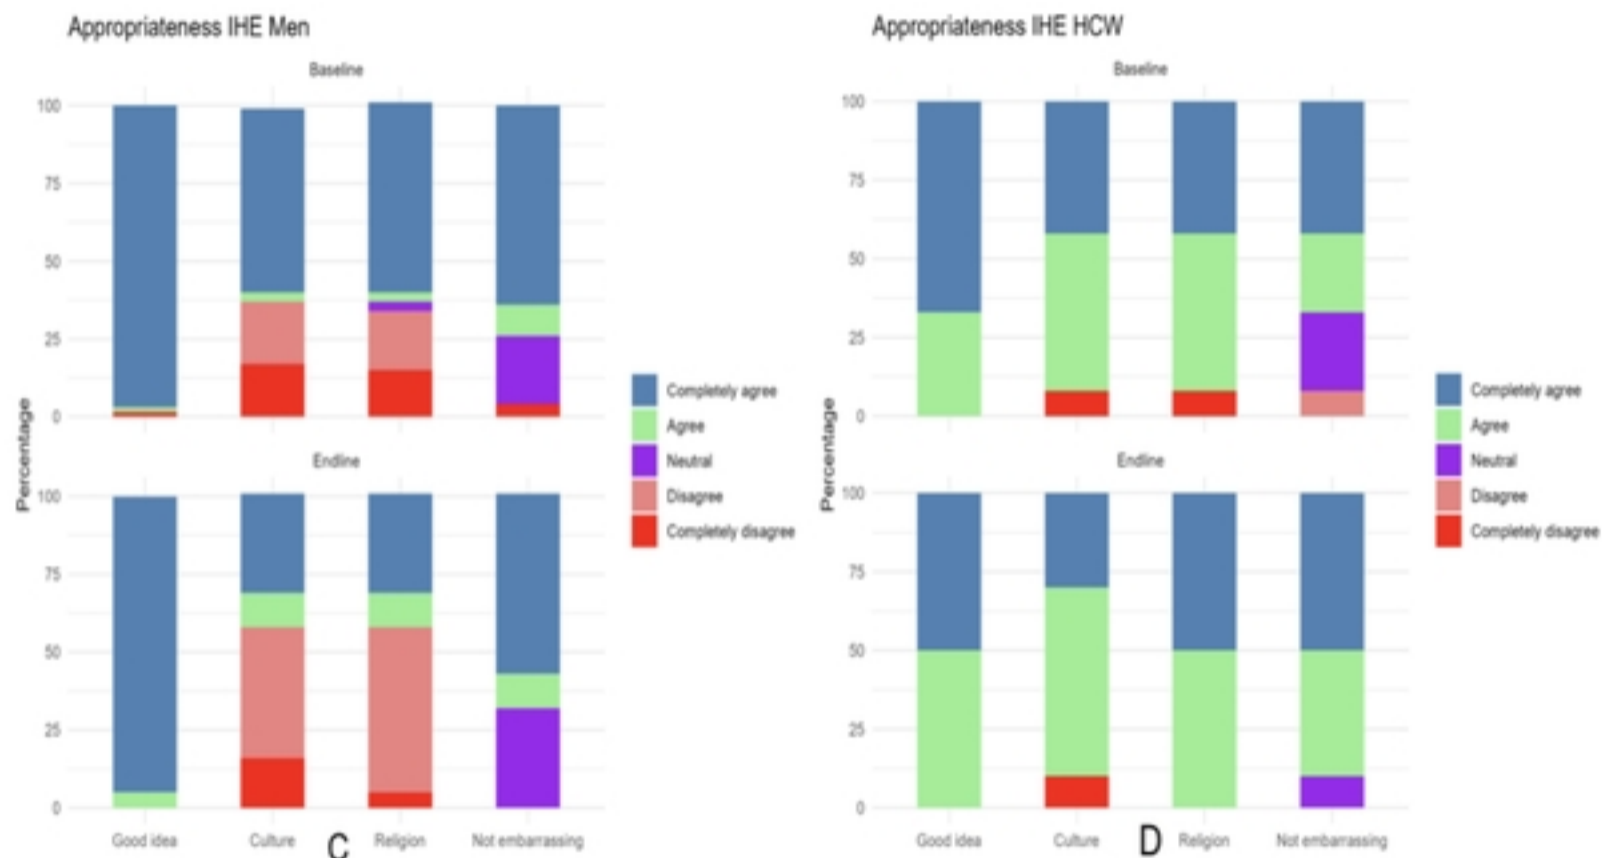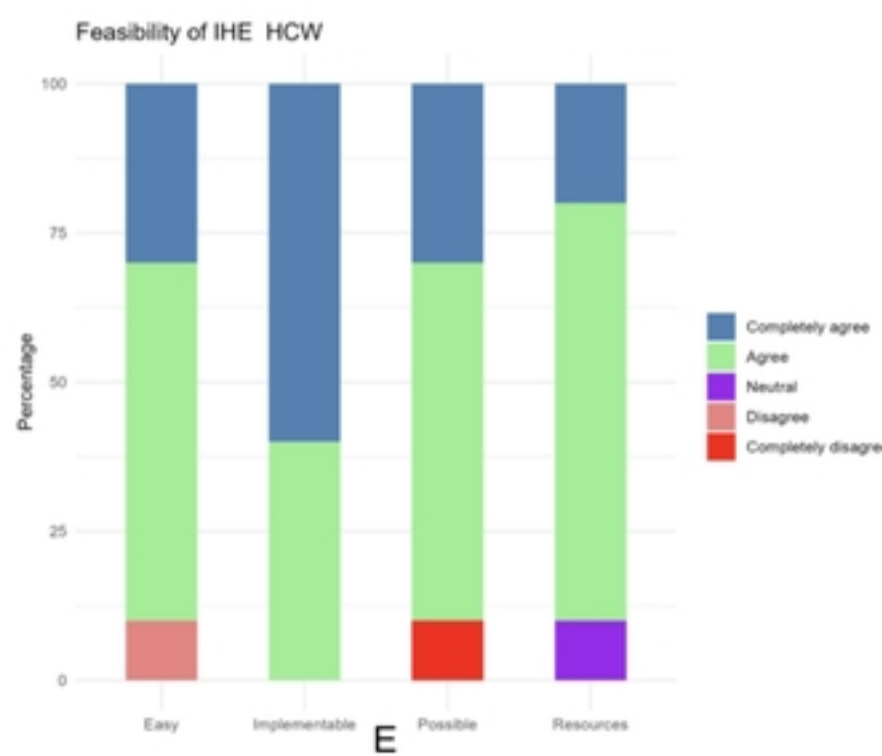

Figure 1

medRxiv preprint doi: <https://doi.org/10.1101/2024.03.27.24304985>; this version posted April 4, 2024. The copyright holder for this preprint (which was not certified by peer review) is the author/funder, who has granted medRxiv a license to display the preprint in perpetuity. It is made available under a [CC-BY 4.0 International license](https://creativecommons.org/licenses/by/4.0/).

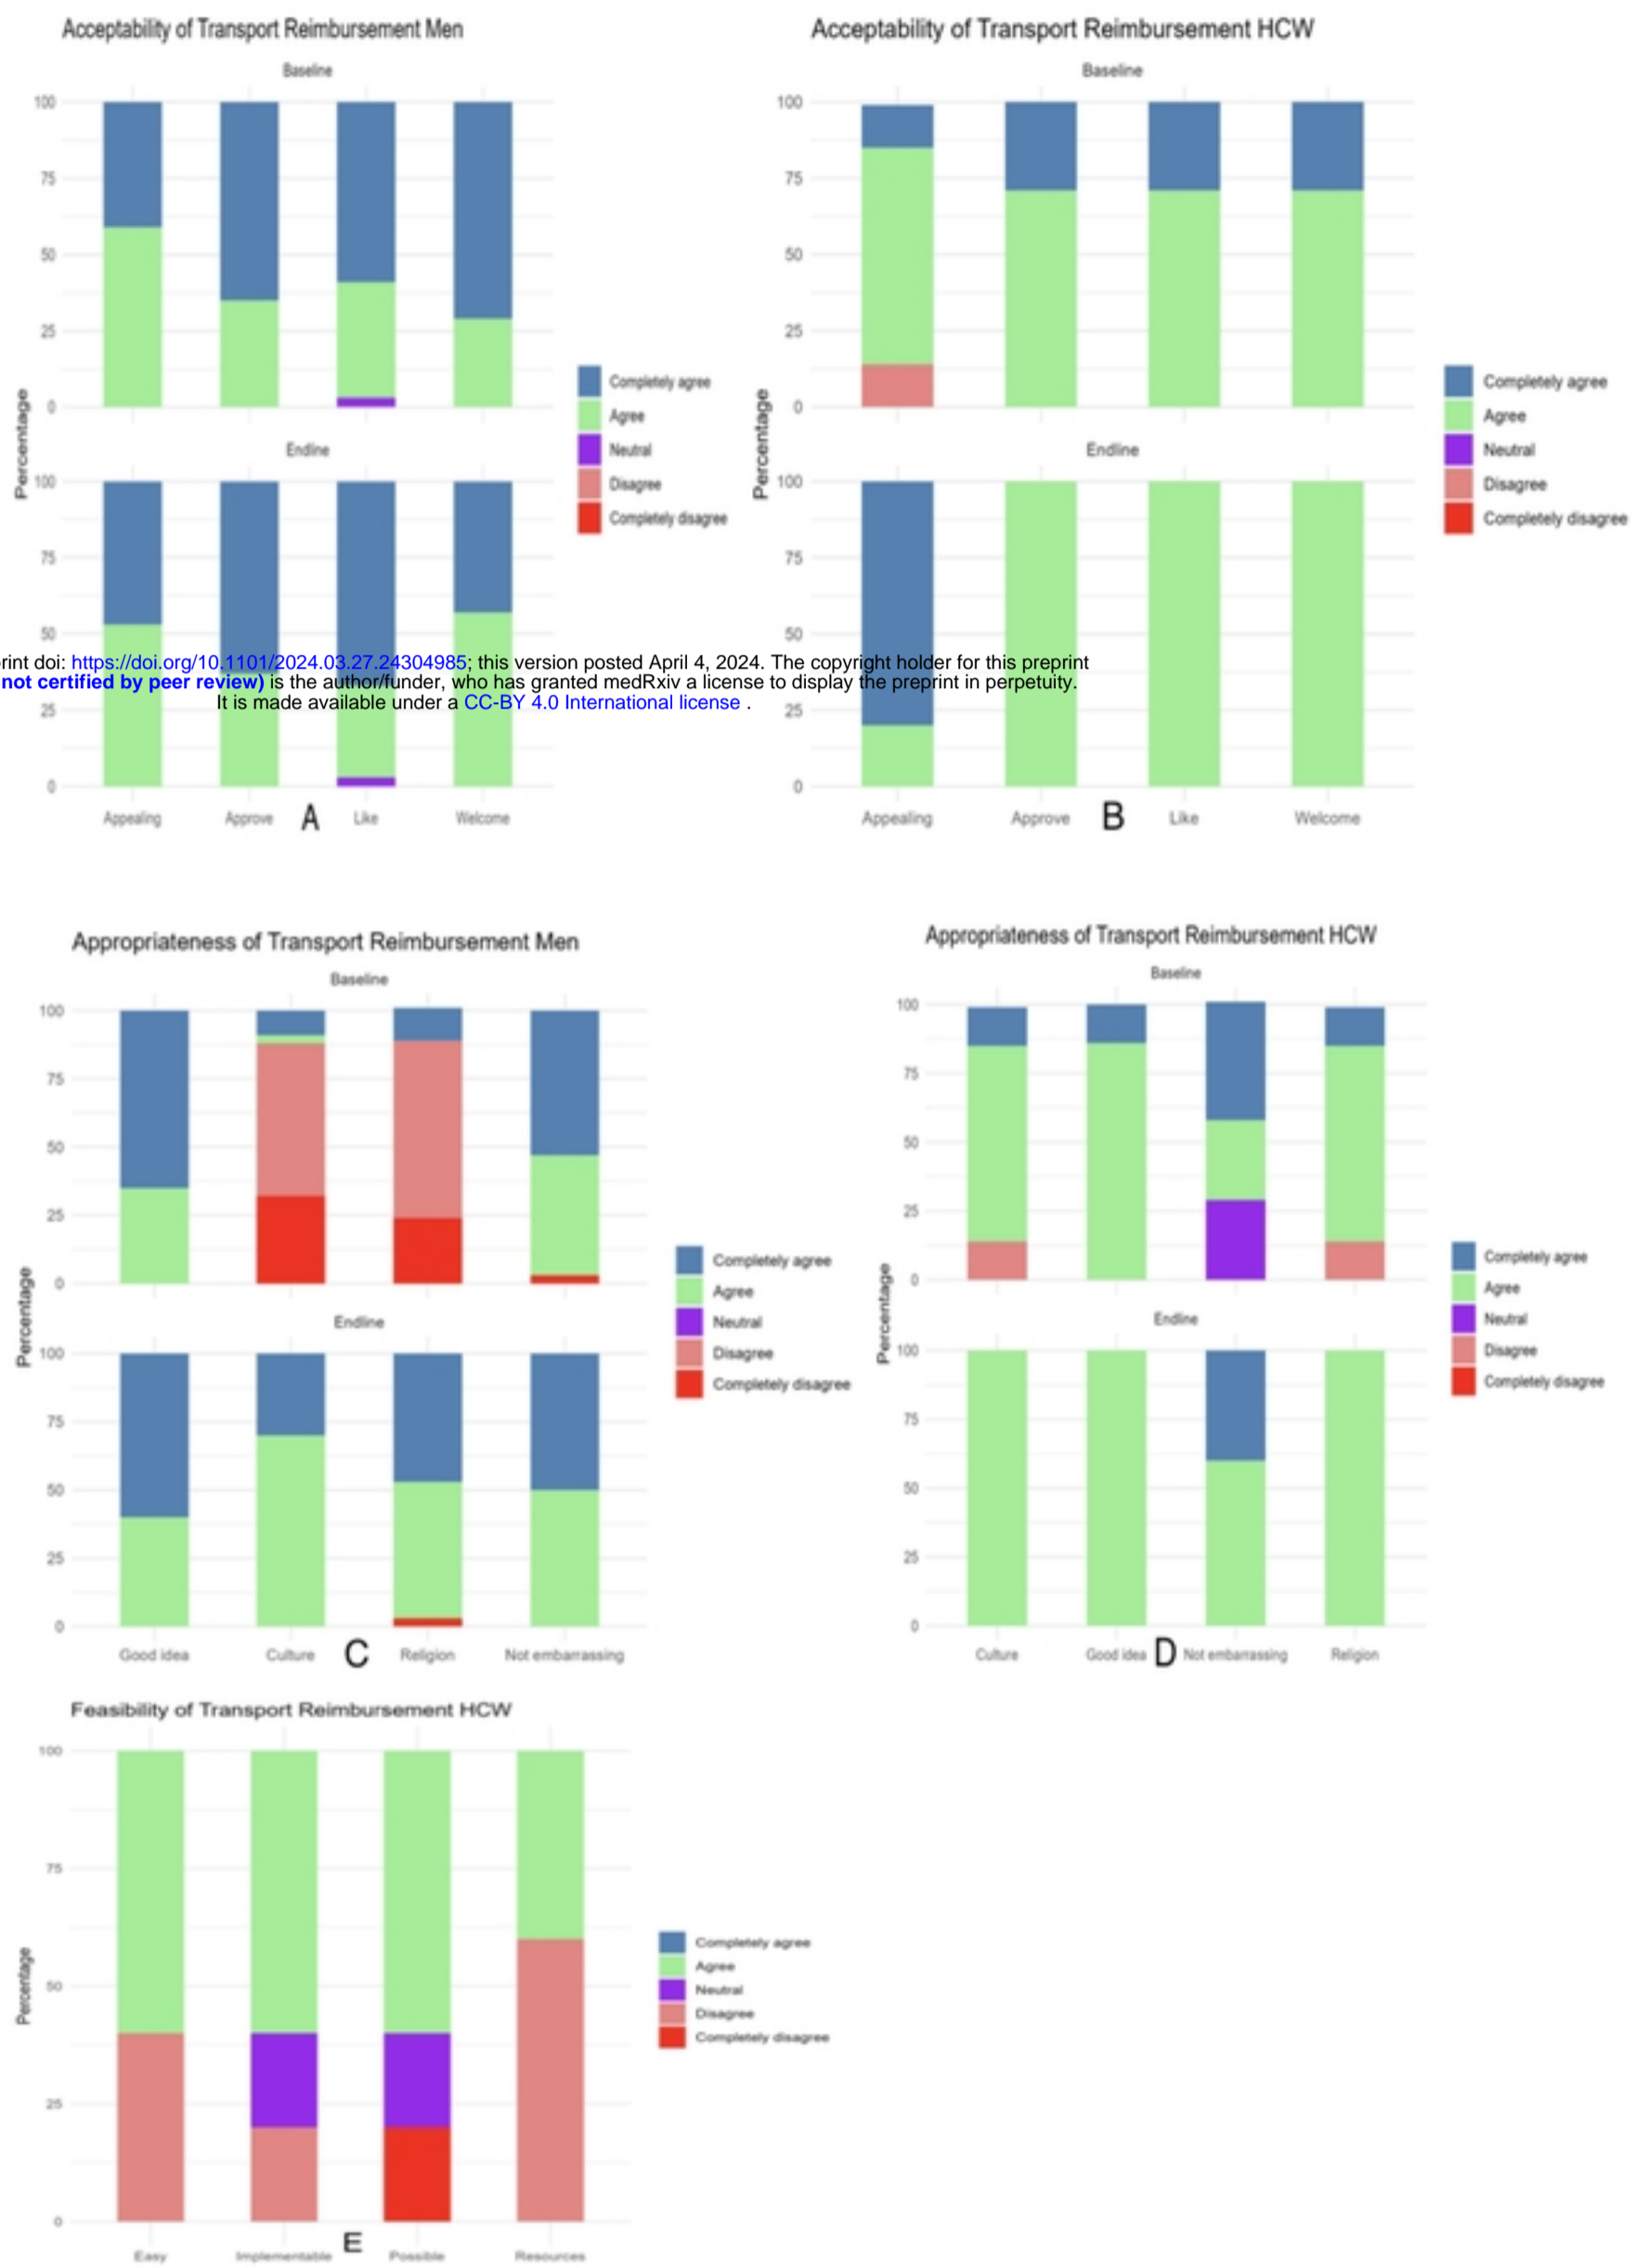

Figure 3

medRxiv preprint doi: <https://doi.org/10.1101/2024.03.27.24304985>; this version posted April 4, 2024. The copyright holder for this preprint (which was not certified by peer review) is the author/funder, who has granted medRxiv a license to display the preprint in perpetuity. It is made available under a [CC-BY 4.0 International license](https://creativecommons.org/licenses/by/4.0/).

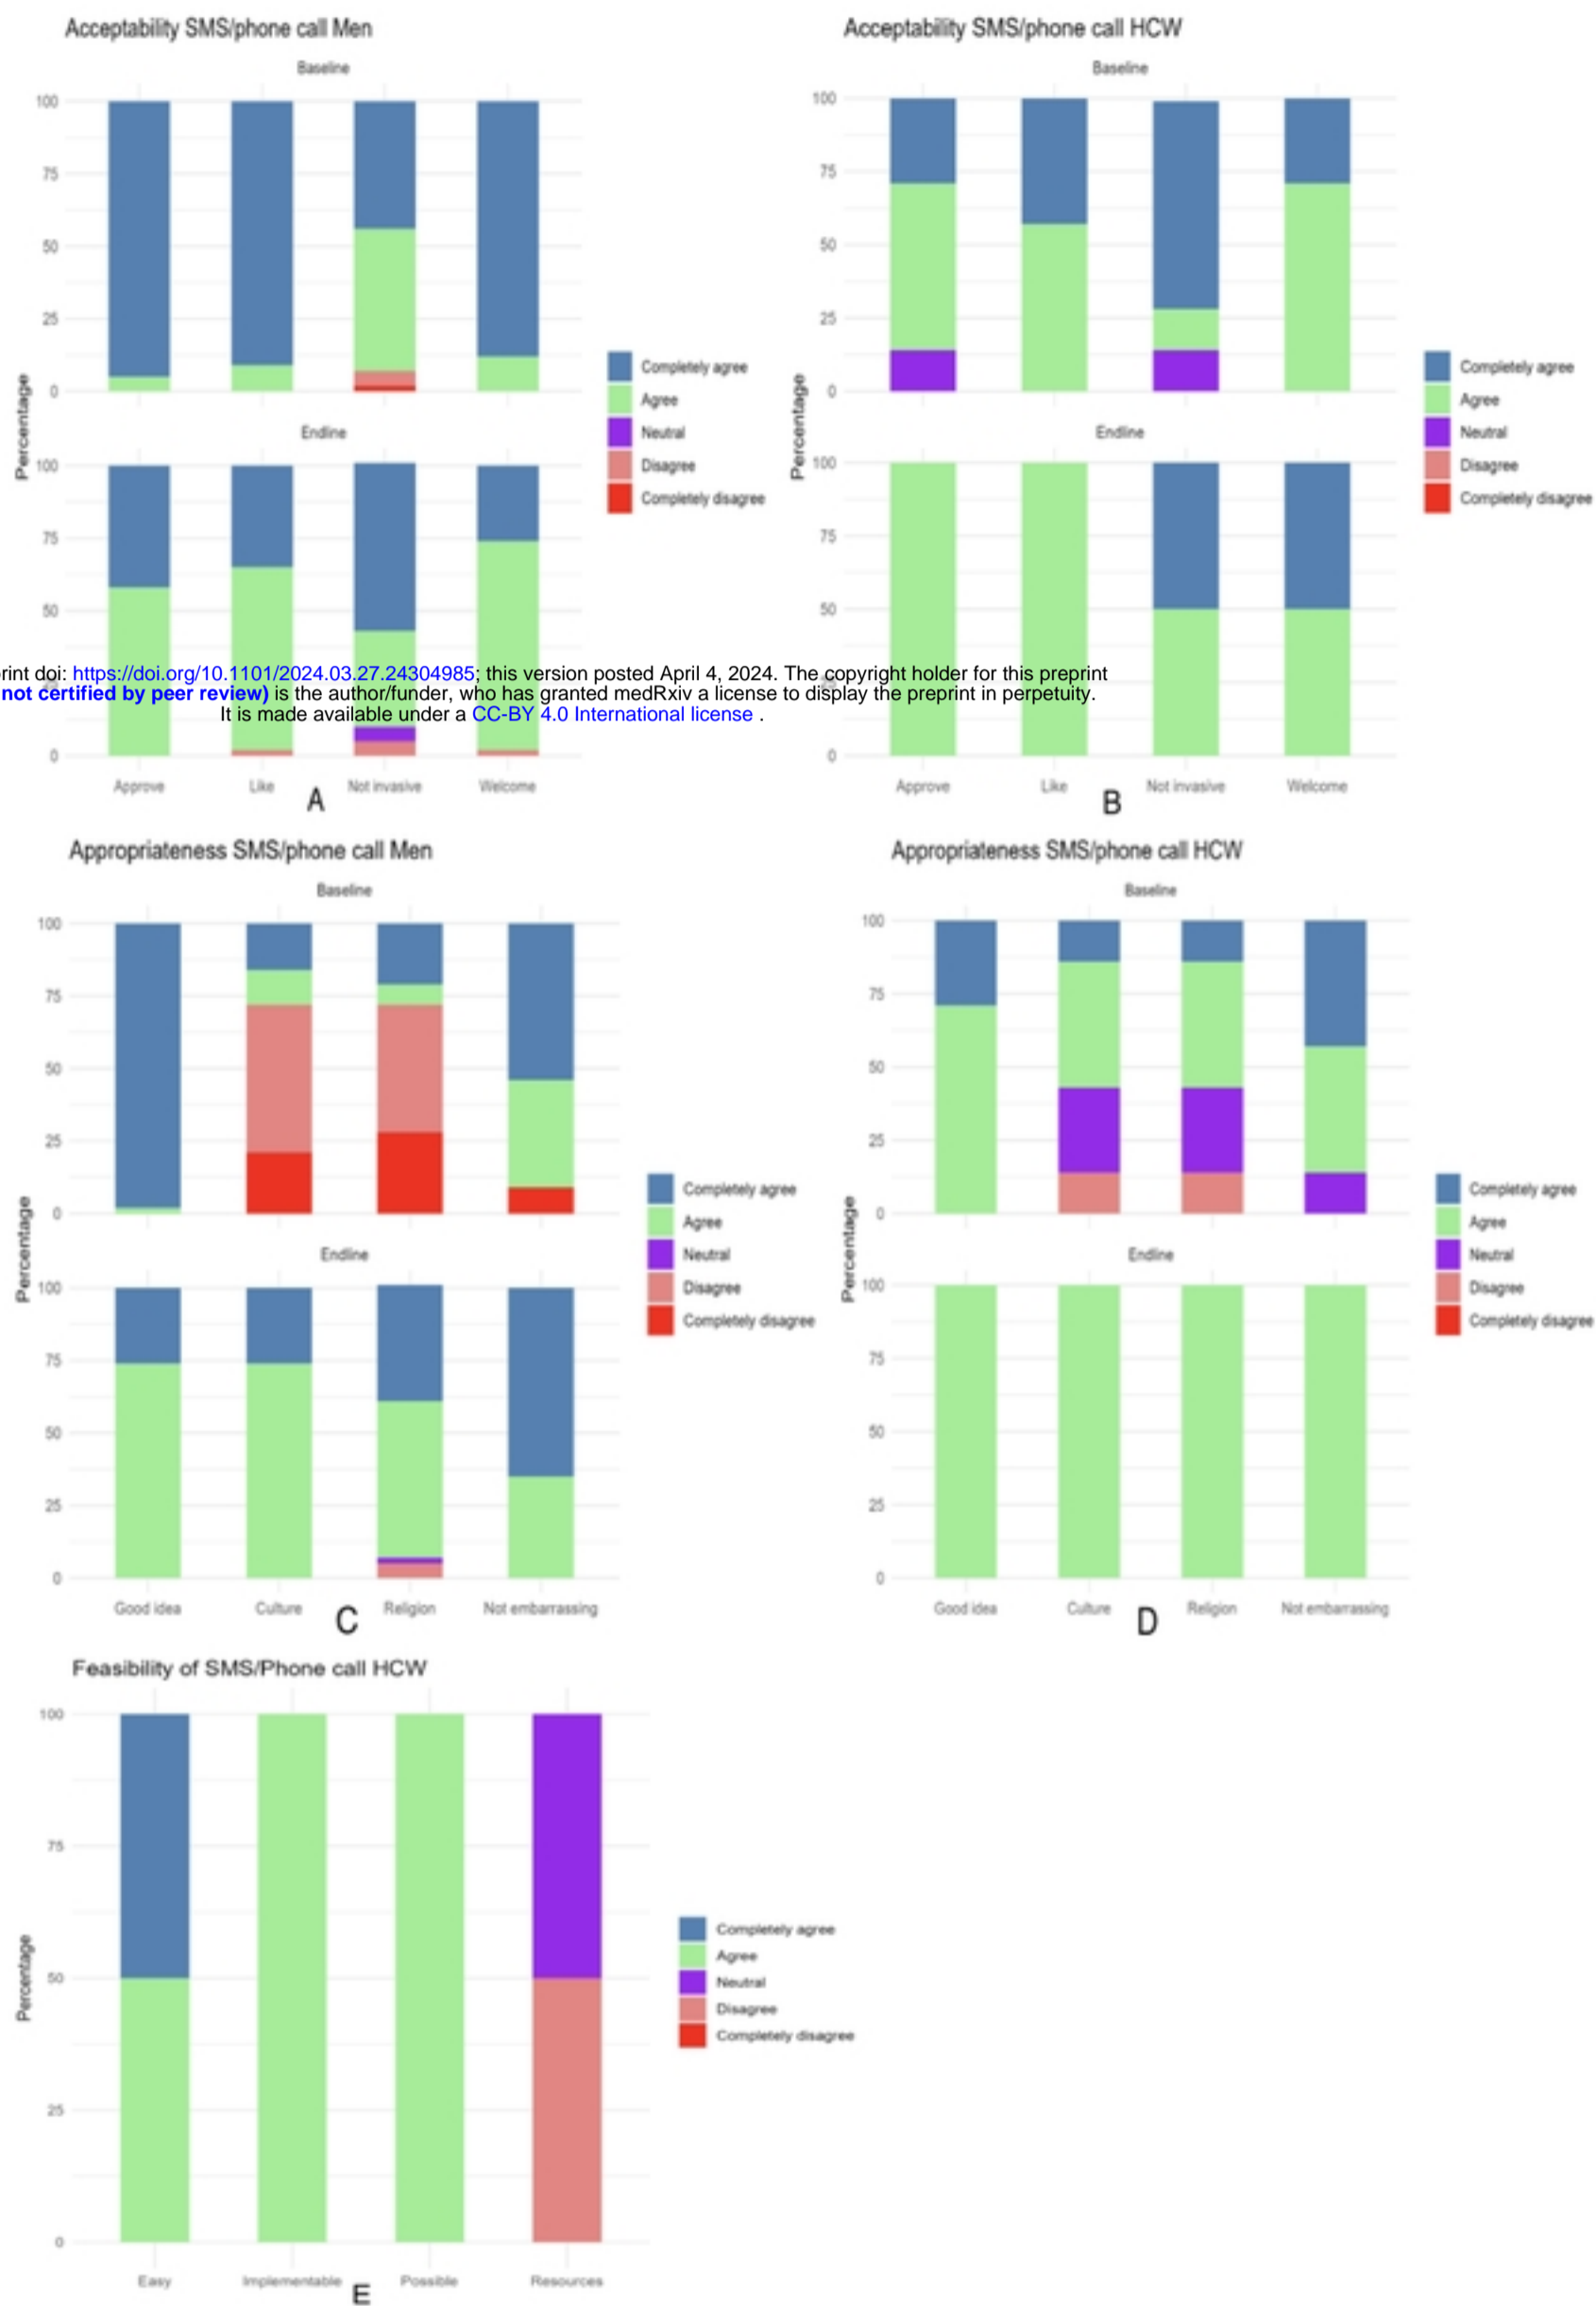

Figure 2
